# Supplementary material
Source: publisher site journal article supplement (https://www.spandidos-publications.com/4758/downloadSupplementary)
Supplement: Supplementary file 1 [file downloadSupplementary]

## Sheet: supplementary1.cell.count
Table SI The number of cells for each celltype in the two sequencing methods
celltype	single_cell_seq	single_nucleus_seq
B cell	328	98
Endothelial Cell	174	1187
Fibroblast	57	4
Hepatocyte	436	9563
Macrophage	417	533
NK cell	432	21
T cell	5695	1208
